# Supplementary material
Source: Research Square preprint supplement (doi:10.21203/rs.3.rs-9134485/v1)
Supplement: Supplementary file 1 [file e58bb892b2519890ff6ffd7b.docx]

**Full uncropped Gels and Blots image(s)**


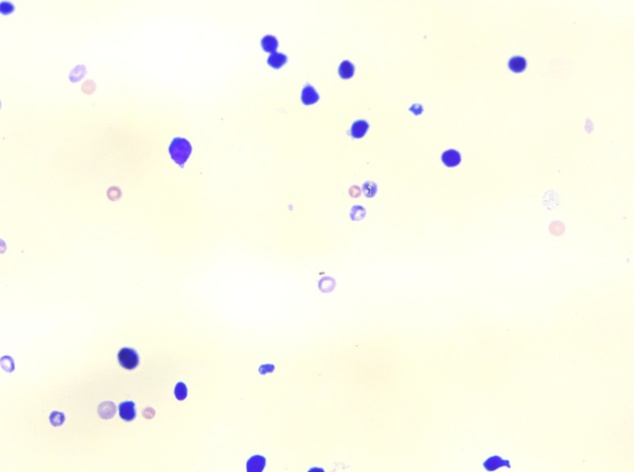

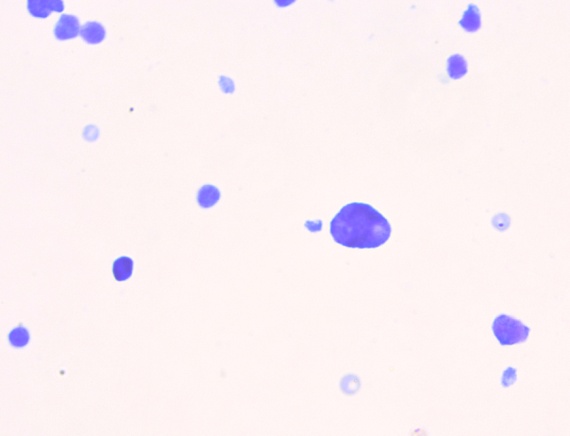


MNPCEs

NCEs

PCEs

**( a ) ( b )**


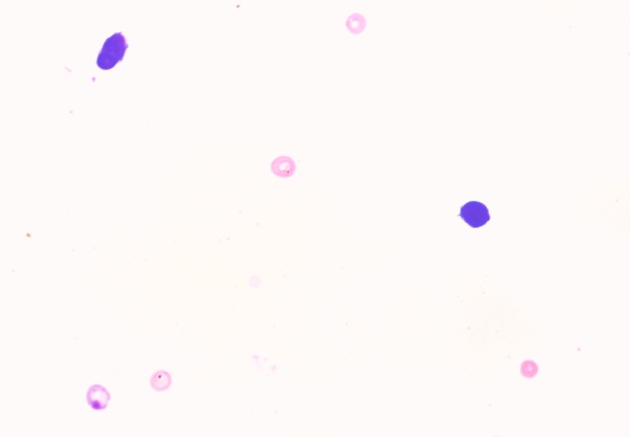

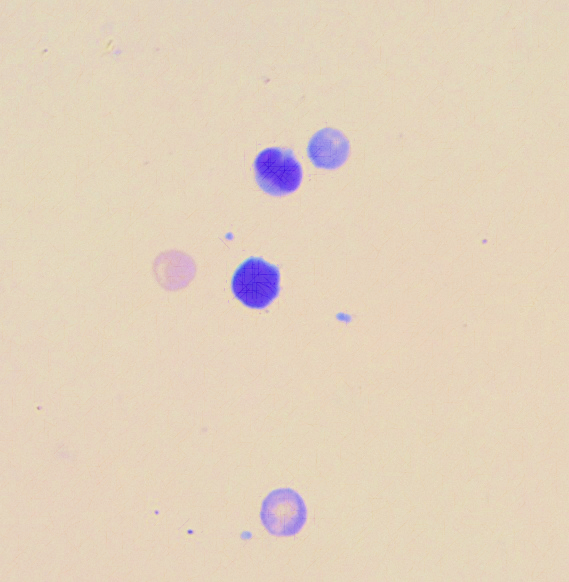


PCEs

NCEs

PMNCs

MNNCEs

MNNCEs

**( c ) ( d )**

**Fig. 1:** Representative images showing micronuclei in bone marrow cells of mice observed under 40X magnification of light microscope. Plate (a) shows normochromatic erythrocytes (NCEs) and polychromatic erythrocytes (PCEs). Plate (b) shows micronucleated polychromatic erythrocytes (MNPCEs). Plate (c) shows micronucleated normochromatic erythrocytes (MNNCEs). Plate (d) shows polymorphonuclear cells (PMNCs)


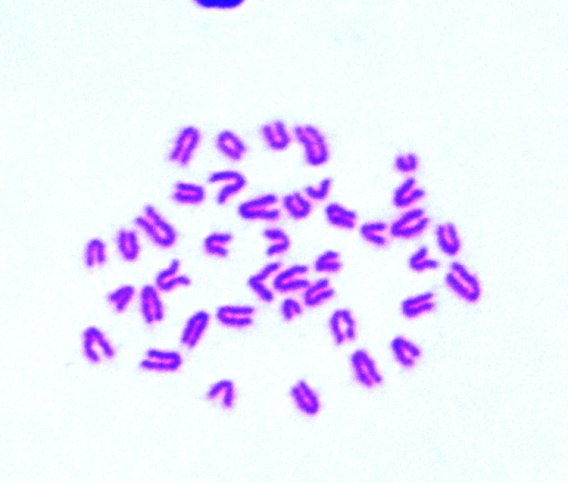

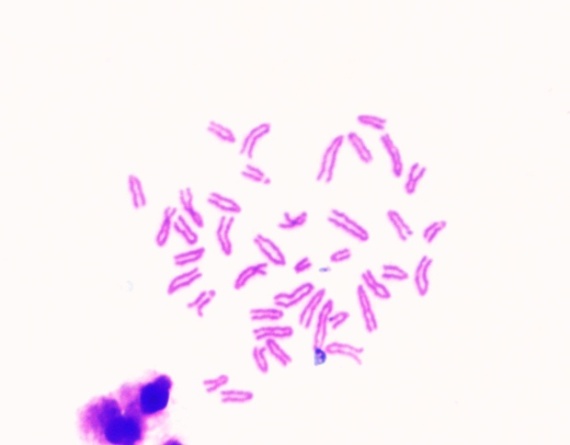


ICGGG

CF

(a) (b)


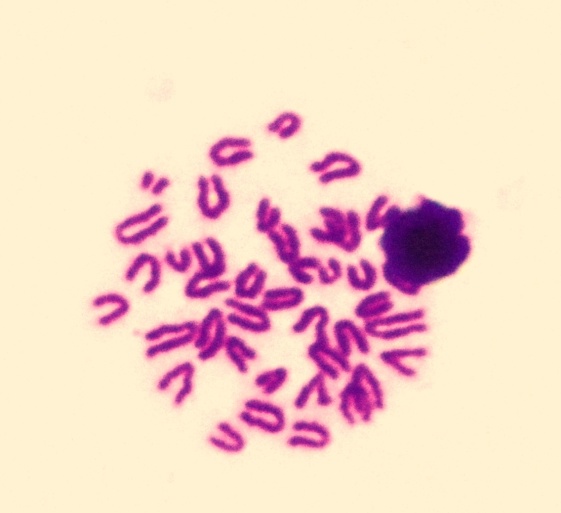

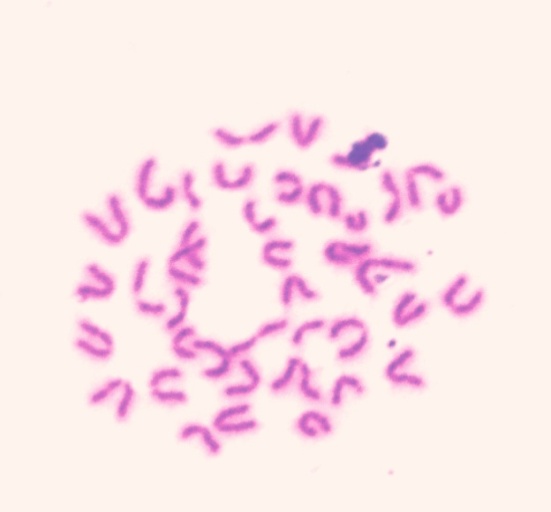


CD

CG

CB

(c) (d)


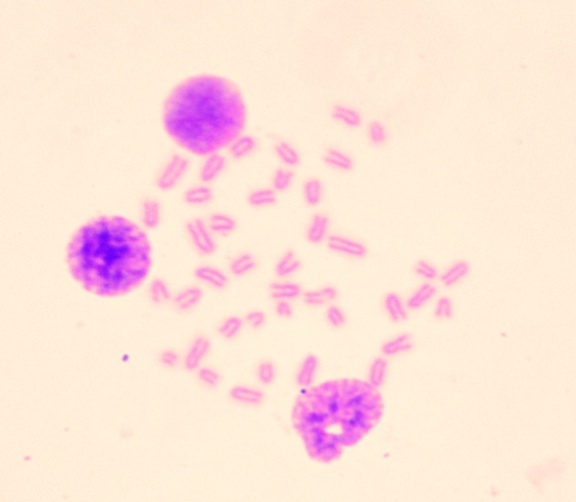

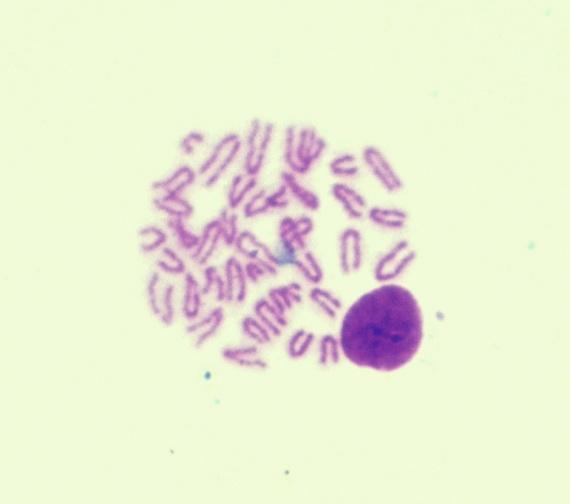


Cg

Cb

(e) (f)


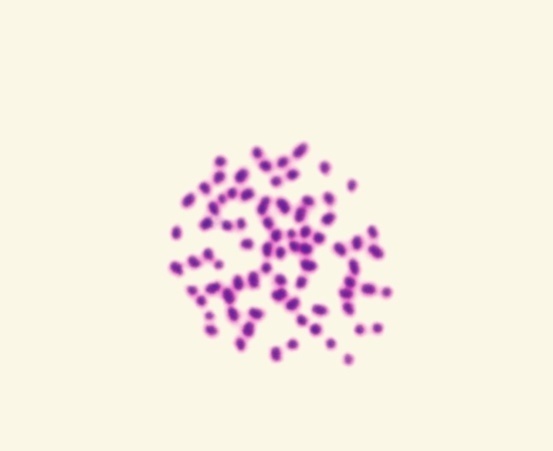

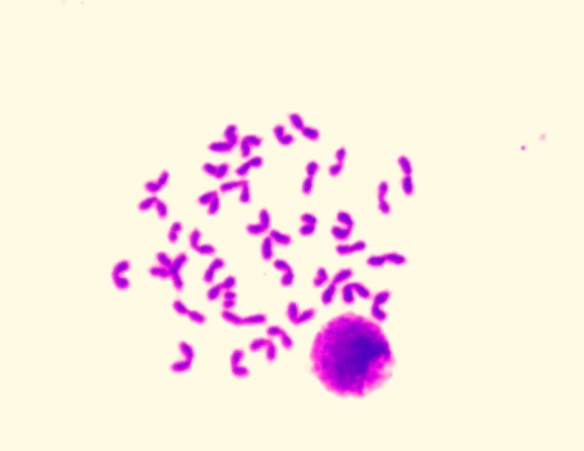


(g) (h)

**Fig. 2:** Representative images of different types of chromosomal aberrations induced in bone marrow cells of mice showing effects of subacute oral exposure of mice to QNP, piperine and their combination observed under ×100 objective (oil) in light microscope; a: Normal metaphasic spread; b: centric fusion (CF); isochromatid gap (ICG); c: chromatid break (CB); d: chromatid gap (CG); centromeric deletion (CD); e: centromeric break with fragments (Cb); f: centromeric gap (Cg); g: Polyploidy; h: Endoreduplication

a


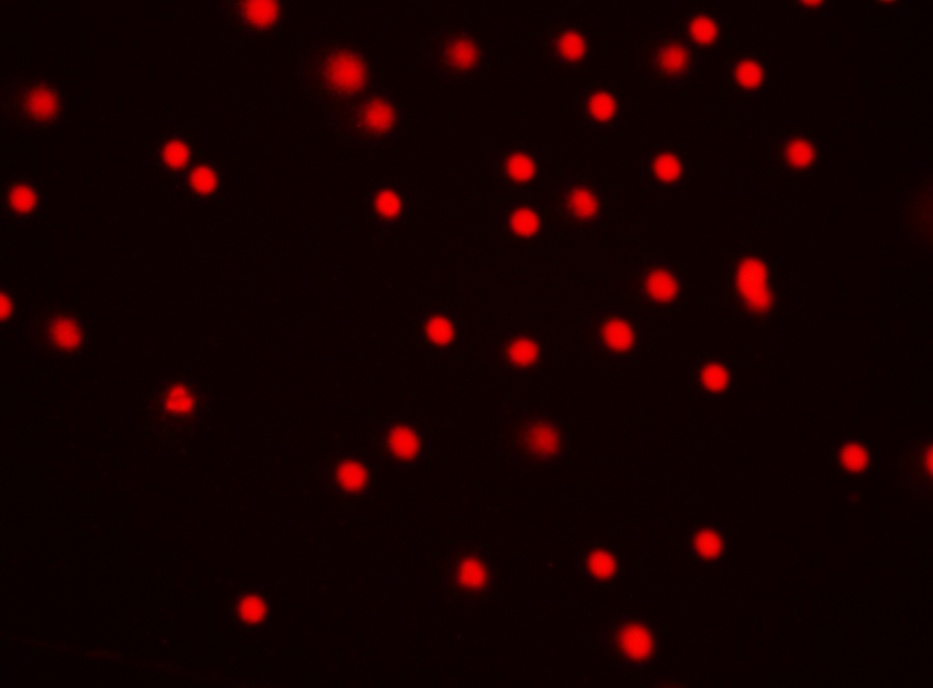

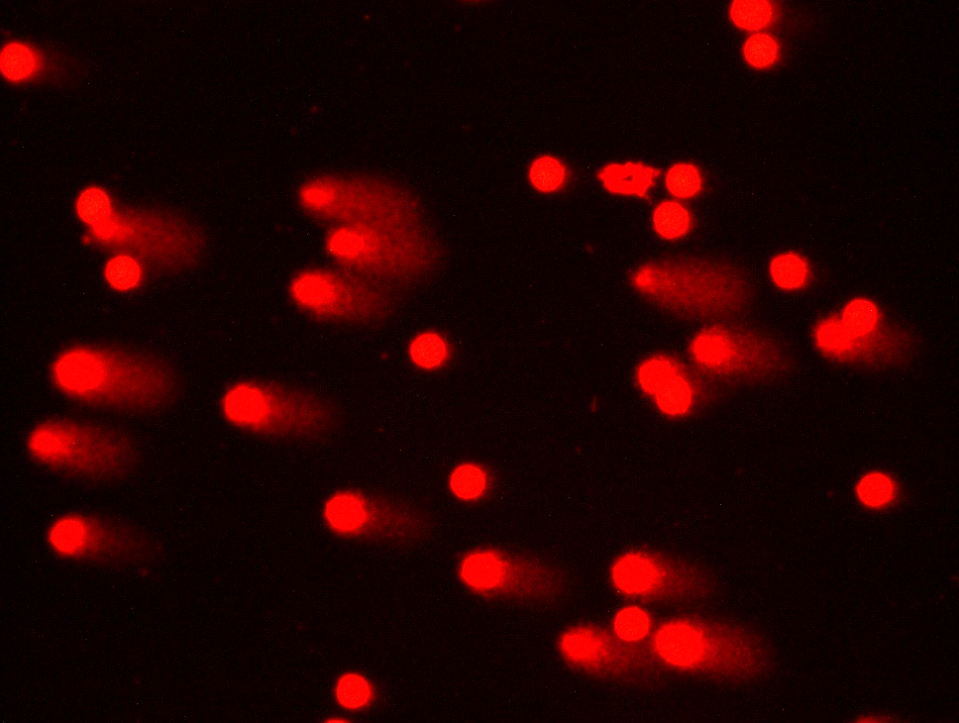


b

**Control QNP I-treated group**


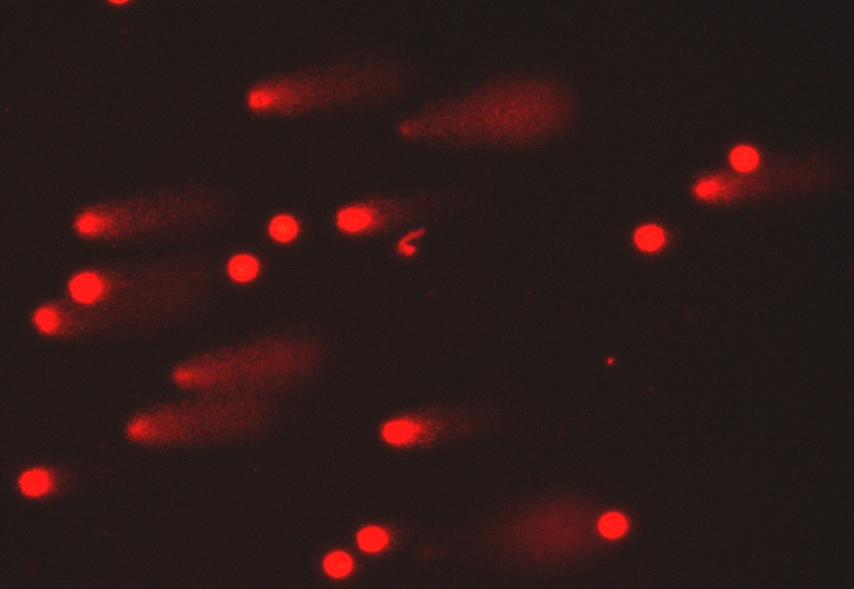

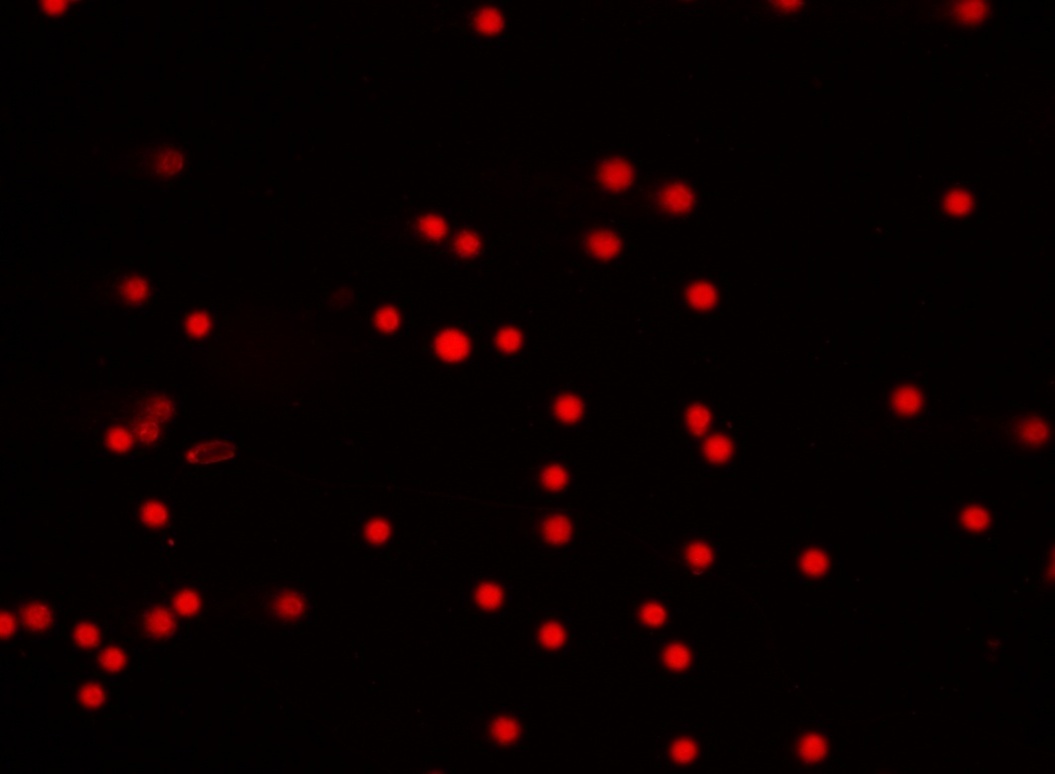


c

d

**QNP II-treated group PIP-treated group**


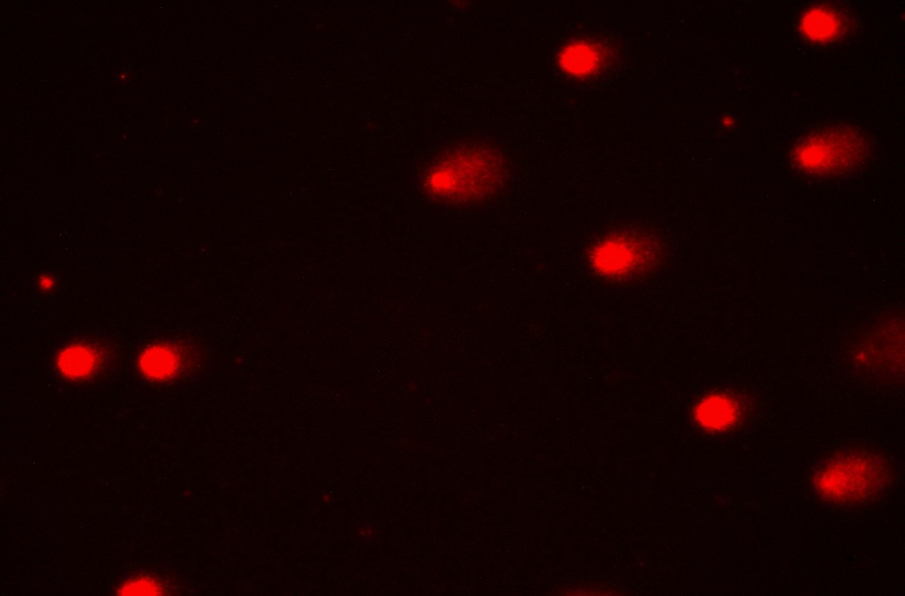

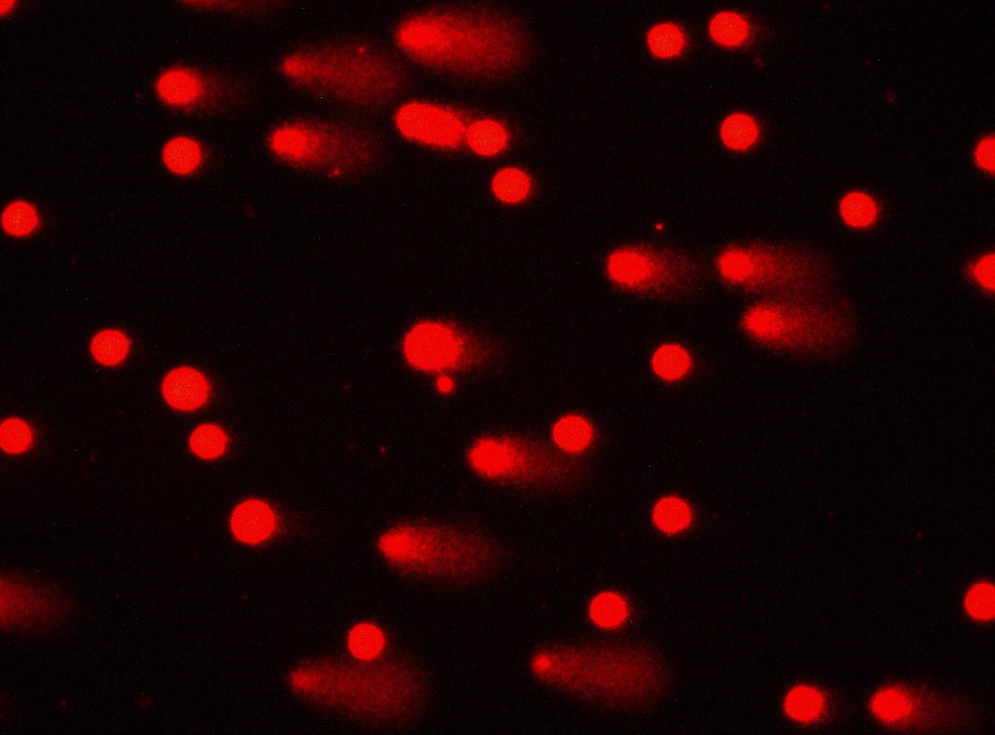


f

e

**QNP I + PIP-treated group QNP II + PIP-treated group**

**Fig**.**3:** Representative images showing effects of subacute oral exposure of mice to QNP, piperine and their combination on DNA damage (comet assay) in bone marrow cells observed at 200x magnification of fluorescent microscope

**. b.**

**Fig. 4: Effects of subacute oral exposure of QNP, piperine and their combination in the mRNA expression of apoptosis related gene Bax and *Bcl-2* of mice. QNP: quinalphos; PIP: piperine (10 mg/kg). Fig. a and b represent fold changes in the mRNA expression of apoptosis related gene Bax and *Bcl-2* of mice. The values were compared using one-way ANOVA followed by Tukey post-hoc test. Means bearing a, b, and c superscripts differ significantly (P<0.05) vs. control, QNP I, and QNP II, respectively**

**
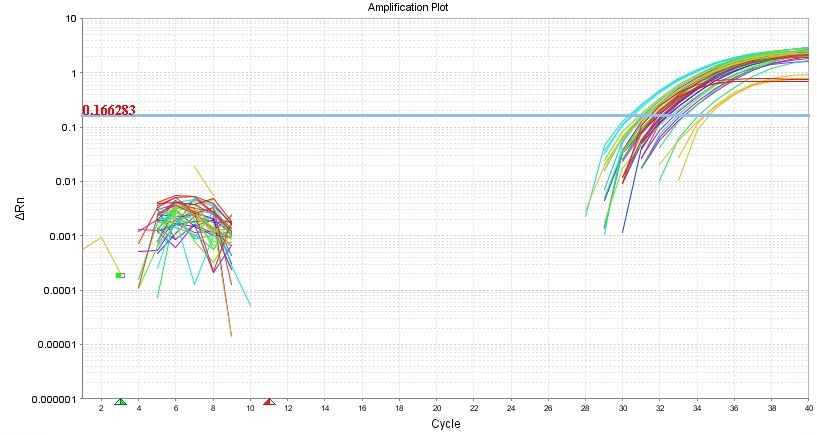
**

**Amplification plot of Bax gene**


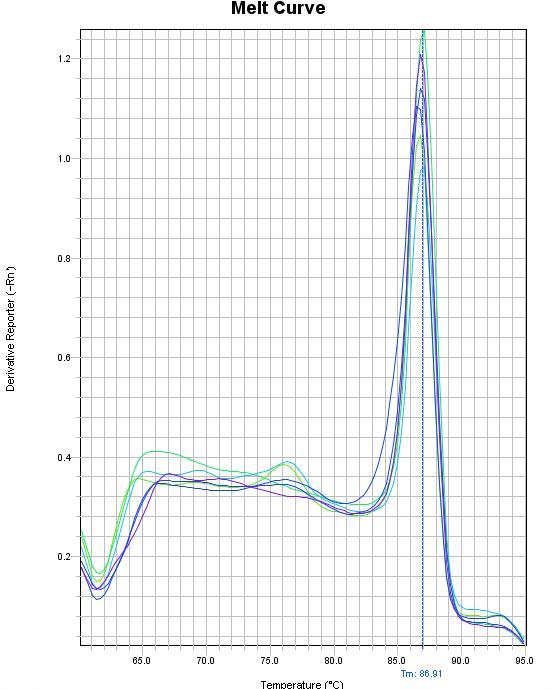


**Melt curve of Bax gene**


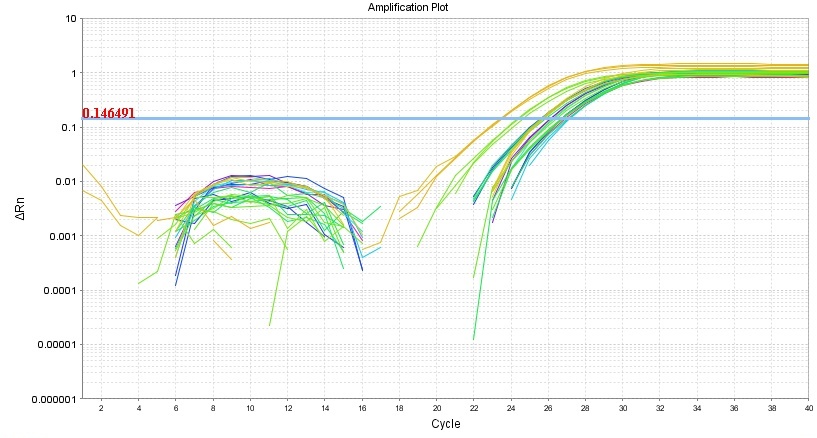


Amplification plot of *Bcl-2* gene


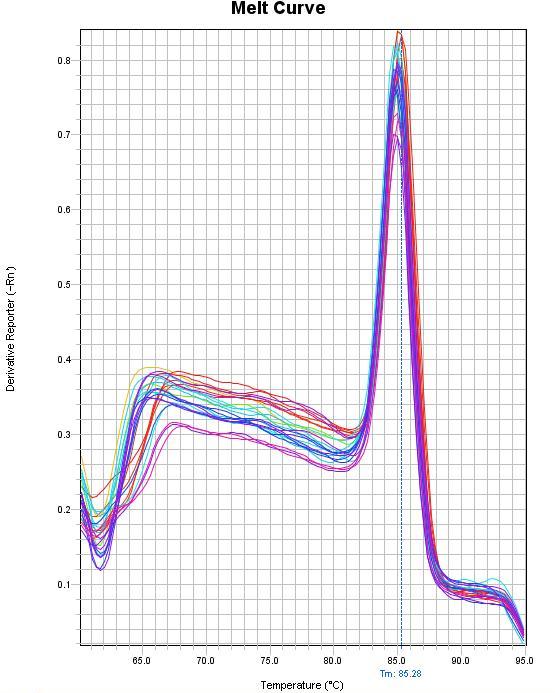


Melt curve of *Bcl-2* gene


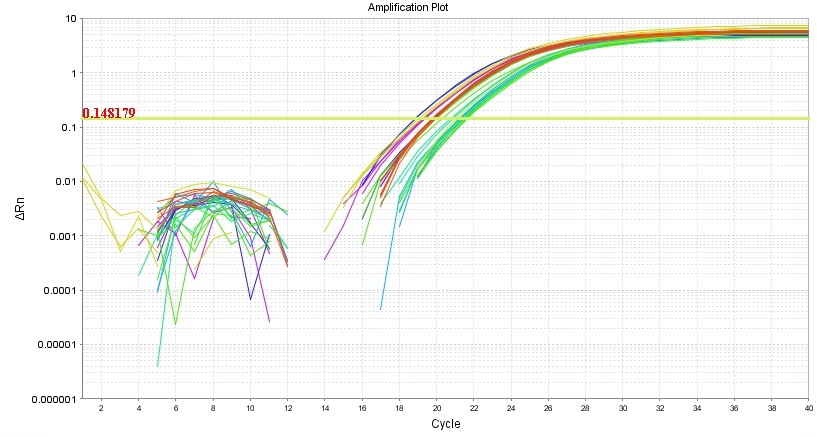


**Amplification plot of ß-actin gene**


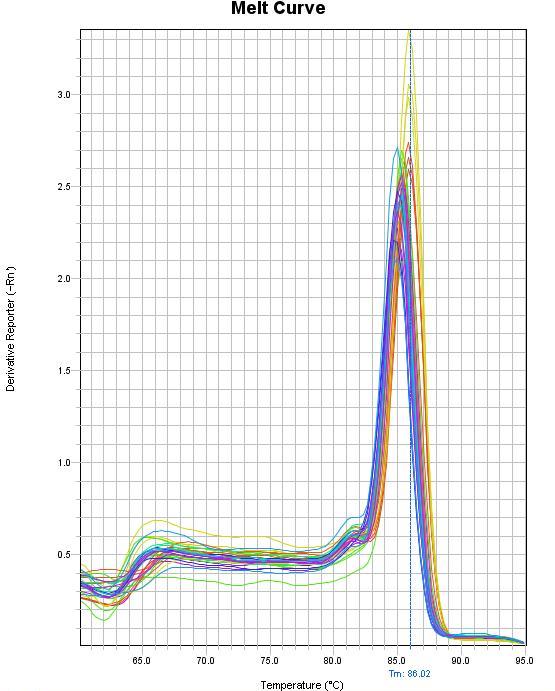


**Melt curve of ß-actin gene**

**Fig. 5: Representative images showing amplification plot and melt curve of Bax, *Bcl-2* and ß-actin gene in bone marrow of mice**
